# Supplementary material
Source: PubMed Central journal article supplement (PMC1304007)
Supplement: biophysj_86_3_1713__1.pdf [file biophysj_86_3_1713__1.pdf]

# Supplementary Material

Summary of the measured ( $R_{1\_O_2}$ ,  $R_{1\_N_2}$ , and  $\Delta R_1$ ) and the computed ( $b$  and AAREA) parameters for the 300 spectrally resolved protein protons of RNase A. The identity of each protein proton of the relaxation rate measurements is listed in the first column (H measured), while the scalar coupled proton shown as a cross-peak in the COSY spectra and its assignment is listed in the second column (H coupled) and the third columns. The residue types are in the fourth column. The measured protein proton spin-lattice relaxation rate constants and the associated standard errors in the fit (in the parentheses) when equilibrated with 11 atm pressure of oxygen and nitrogen are listed in the fifth ( $R_{1\_O_2}$ ) and the sixth ( $R_{1\_N_2}$ ) columns respectively. The differences in the protein-proton relaxation rate constants, i.e., the oxygen-induced relaxation rate ( $\Delta R_1$ ), are summarized in the seventh column. The distance of closest approach ( $b$ ) between each protein proton and a surface molecular oxygen and the accessibility areas (AAREA) of each proton, computed from a protein structural model (7RSA), are listed in the last two columns.

| H measured | H coupled | assignment (ppm) | residue type | $R_1-O_2$ ( $s^{-1}$ ) | $R_1-N_2$ ( $s^{-1}$ ) | $\Delta R_1$ ( $s^{-1}$ ) | b ( $\text{\AA}$ ) | AAREA ( $\text{\AA}^2$ ) |
|------------|-----------|------------------|--------------|------------------------|------------------------|---------------------------|--------------------|--------------------------|
| 1:HA       | HB1       | {3.98,1.63}      | LYS          | 2.06(0.11)             | 0.64(0.04)             | 1.42(0.11)                | 2.60               | 16.2                     |
| 1:HB1      | HA        | {1.62,3.99}      | LYS          | 3.39(0.12)             | 1.54(0.04)             | 1.84(0.13)                | 2.60               | 11.1                     |
| 2:HA       | HB1       | {4.52,1.85}      | GLU          | 1.75(0.2)              | 0.47(0.08)             | 1.28(0.21)                | 2.60               | 10.1                     |
| 2:HB1      | HA        | {1.85,4.53}      | GLU          | 2.27(0.2)              | 0.91(0.05)             | 1.36(0.21)                | 2.60               | 14.1                     |
| 2:HB2      | HB1       | {1.64,1.9}       | GLU          | 3.47(0.53)             | 0.79(0.07)             | 2.68(0.53)                | 2.60               | 6.2                      |
| 3:HB       | HG1       | {4.77,1.1}       | THR          | 2.18(0.11)             | 0.49(0.03)             | 1.69(0.11)                | 2.60               | 10.1                     |
| 3:HG1      | HB        | {1.09,4.79}      | THR          | 3.38(0.44)             | 0.79(0.04)             | 2.59(0.44)                | 2.60               | 5.3                      |
| 4:HA       | HB1       | {4.14,1.2}       | ALA          | 2.92(0.1)              | 0.86(0.04)             | 2.05(0.11)                | 2.60               | 2.7                      |
| 4:HB1      | HA        | {1.18,4.14}      | ALA          | 3.73(0.13)             | 1.67(0.07)             | 2.06(0.15)                | 2.60               | 20.5                     |
| 5:HA       | HB1       | {4.26,1.13}      | ALA          | 2.03(0.13)             | 0.8(0.05)              | 1.22(0.13)                | 3.09               | 0                        |
| 5:HB1      | HA        | {1.12,4.26}      | ALA          | 3.34(0.11)             | 1.31(0.07)             | 2.03(0.12)                | 2.60               | 5.5                      |
| 6:HA       | HB1       | {4.15,1.3}       | ALA          | 2.92(0.08)             | 0.73(0.04)             | 2.19(0.09)                | 2.60               | 3.9                      |
| 6:HB1      | HA        | {1.3,4.15}       | ALA          | 2.87(0.08)             | 1.25(0.04)             | 1.62(0.09)                | 3.11               | 0                        |
| 7:HA       | HB2       | {3.96,1.53}      | LYS          | 1.55(0.43)             | 0.72(0.35)             | 0.83(0.55)                | 4.18               | 0                        |
| 7:HB1      | HB2       | {1.78,1.56}      | LYS          | 2.01(0.24)             | 0.76(0.09)             | 1.25(0.26)                | 2.60               | 0.5                      |
| 7:HB2      | HB1       | {1.55,1.79}      | LYS          | 2.78(0.52)             | 1.01(0.1)              | 1.77(0.52)                | 2.72               | 0.5                      |
| 8:HA       | HB1       | {4.48,3.32}      | PHE          | 1.54(0.19)             | 0.24(0.07)             | 1.3(0.2)                  | 2.60               | 2.2                      |
| 8:HB1      | HA        | {3.32,4.49}      | PHE          | 2.07(0.12)             | 0.36(0.06)             | 1.72(0.14)                | 2.83               | 0                        |
| 8:HB2      | HB1       | {2.85,3.35}      | PHE          | 2.12(0.4)              | 0.42(0.12)             | 1.7(0.42)                 | 2.93               | 0                        |
| 8:HD1      | HE1       | {7.31,7.13}      | PHE          | 12.24(1.97)            | 0.44(0.05)             | 11.8(1.97)                | 2.61               | 0.1                      |
| 8:HE1      | HD1       | {7.12,7.3}       | PHE          | 4.98(0.55)             | 0.42(0.04)             | 4.56(0.55)                | 4.53               | 0                        |
| 9:HA       | HB1       | {3.68,2.15}      | GLU          | 4.4(1.39)              | 0.35(0.09)             | 4.05(1.4)                 | 3.80               | 0                        |
| 9:HB1      | HA        | {2.14,3.68}      | GLU          | 4.11(0.52)             | 0.57(0.06)             | 3.53(0.52)                | 2.60               | 4.9                      |
| 10:HA      | HB1       | {4.19,1.78}      | ARG          | 1.43(0.16)             | 0.27(0.05)             | 1.17(0.17)                | 2.60               | 6.8                      |
| 10:HB1     | HA        | {1.77,4.2}       | ARG          | 1.51(0.1)              | 0.34(0.03)             | 1.17(0.11)                | 2.60               | 7.9                      |
| 11:HA      | HB1       | {3.76,1.15}      | GLN          | 1.01(0.16)             | 0.43(0.09)             | 0.59(0.18)                | 6.02               | 0                        |
| 11:HB1     | HA        | {1.15,3.78}      | GLN          | 1.1(0.12)              | 0.29(0.07)             | 0.82(0.14)                | 3.63               | 0                        |
| 12:HA      | HB2       | {4.99,1.45}      | HIS          | 0.78(0.11)             | 0.17(0.07)             | 0.6(0.13)                 | 6.15               | 0                        |
| 12:HB1     | HB2       | {2.4,1.46}       | HIS          | 1.57(0.12)             | 0.19(0.05)             | 1.39(0.13)                | 5.42               | 0                        |
| 12:HB2     | HA        | {1.45,5}         | HIS          | 1.73(0.08)             | 0.22(0.07)             | 1.51(0.11)                | 5.85               | 0                        |
| 13:HA      | HB1       | {5.57,2.6}       | MET          | 1.96(0.18)             | 0.16(0.06)             | 1.8(0.19)                 | 4.64               | 0                        |
| 13:HB1     | HA        | {2.59,5.57}      | MET          | 2.89(0.34)             | 0.34(0.06)             | 2.55(0.34)                | 2.60               | 1.8                      |
| 13:HB2     | HB1       | {1.51,2.61}      | MET          | 1.47(0.37)             | 0.58(0.15)             | 0.89(0.4)                 | 2.60               | 3.2                      |
| 14:HA      | HB1       | {5.04,1.9}       | ASP          | 0.75(0.08)             | 0.1(0.03)              | 0.65(0.09)                | 2.60               | 1                        |
| 14:HB1     | HA        | {1.9,5.05}       | ASP          | 0.78(0.12)             | 0.09(0.05)             | 0.69(0.14)                | 4.43               | 0                        |
| 15:HA      | HB2       | {4.36,3.75}      | SER          | 3.21(0.52)             | 0.18(0.05)             | 3.03(0.52)                | 2.60               | 0.5                      |
| 15:HB1     | HA        | {3.91,4.37}      | SER          | 2.03(0.27)             | 0.52(0.05)             | 1.51(0.27)                | 2.60               | 16.2                     |

| H measured | H coupled | assignment (ppm) | residue type | $R_1-O_2$ ( $s^{-1}$ ) | $R_1-N_2$ ( $s^{-1}$ ) | $\Delta R_1$ ( $s^{-1}$ ) | b ( $\text{\AA}$ ) | AAREA ( $\text{\AA}^2$ ) |
|------------|-----------|------------------|--------------|------------------------|------------------------|---------------------------|--------------------|--------------------------|
| 15:HB2     | HA        | {3.74,4.37}      | SER          | 2.4(0.24)              | 0.22(0.04)             | 2.18(0.24)                | 2.60               | 8.1                      |
| 17:HA      | HB        | {4.56,4.11}      | THR          | 1.73(0.34)             | 0.35(0.11)             | 1.38(0.36)                | 2.60               | 6.8                      |
| 17:HB      | HG1       | {4.11,0.74}      | THR          | 2.05(0.09)             | 0.51(0.05)             | 1.54(0.1)                 | 2.60               | 5.4                      |
| 17:HG1     | HB        | {0.73,4.12}      | THR          | 2.75(0.11)             | 1.11(0.05)             | 1.64(0.12)                | 3.99               | 0                        |
| 18:HA      | HB1       | {4.26,3.75}      | SER          | 2.38(0.46)             | 0.35(0.09)             | 2.03(0.47)                | 2.60               | 4.2                      |
| 18:HB1     | HA        | {3.78,4.28}      | SER          | 2.35(0.24)             | 0.63(0.1)              | 1.72(0.26)                | 2.60               | 14.3                     |
| 19:HA      | HB1       | {3.09,0.65}      | ALA          | 1.62(0.13)             | 0.41(0.04)             | 1.21(0.14)                | 3.93               | 0.4                      |
| 19:HB1     | HA        | {0.62,3.12}      | ALA          | 3(0.21)                | 0.7(0.04)              | 2.29(0.21)                | 2.60               | 13.1                     |
| 20:HA      | HB1       | {3.38,0.47}      | ALA          | 1.87(0.09)             | 0.53(0.03)             | 1.34(0.09)                | 3.98               | 0                        |
| 20:HB1     | HA        | {0.46,3.4}       | ALA          | 4.53(0.27)             | 1.15(0.1)              | 3.38(0.29)                | 2.60               | 0.8                      |
| 21:HA      | HB1       | {4.25,3.93}      | SER          | 4.82(1.45)             | 0.42(0.08)             | 4.39(1.45)                | 2.60               | 11.1                     |
| 21:HB1     | HB2       | {4,3.76}         | SER          | 2.68(0.2)              | 0.31(0.04)             | 2.37(0.2)                 | 2.60               | 14.6                     |
| 21:HB2     | HB1       | {3.74,3.99}      | SER          | 2.83(0.16)             | 0.3(0.03)              | 2.54(0.16)                | 2.60               | 15.5                     |
| 22:HA      | HB1       | {4.79,4.09}      | SER          | 29.57(>10)             | 0.61(0.09)             | 28.96(>10)                | 2.60               | 11.1                     |
| 22:HB1     | HB2       | {4.09,3.86}      | SER          | 3.1(0.15)              | 0.8(0.02)              | 2.3(0.16)                 | 2.60               | 13.1                     |
| 22:HB2     | HB1       | {3.87,4.12}      | SER          | 3.7(0.26)              | 1.01(0.09)             | 2.69(0.27)                | 2.60               | 10.3                     |
| 23:HA      | HB1       | {4.42,4.12}      | SER          | 2.58(0.68)             | 0.34(0.08)             | 2.24(0.69)                | 2.60               | 4.5                      |
| 23:HB1     | HB2       | {4.14,4}         | SER          | 3.13(0.28)             | 0.66(0.05)             | 2.47(0.28)                | 2.60               | 10.1                     |
| 23:HB2     | HB1       | {3.98,4.12}      | SER          | 2.77(0.18)             | 0.76(0.03)             | 2.01(0.18)                | 2.60               | 18.8                     |
| 24:HA      | HB1       | {5.04,2.77}      | ASN          | 2.06(0.13)             | 0.37(0.06)             | 1.69(0.15)                | 2.97               | 0                        |
| 24:HB1     | HA        | {2.75,5.04}      | ASN          | 1.82(0.15)             | 0.72(0.07)             | 1.1(0.17)                 | 2.60               | 0.8                      |
| 24:HB2     | HA        | {2.51,5.06}      | ASN          | 2.65(0.46)             | 0.78(0.13)             | 1.88(0.48)                | 2.60               | 0.6                      |
| 25:HB1     | HB2       | {3.32,2.75}      | TYR          | 2.82(0.47)             | 0.33(0.08)             | 2.49(0.48)                | 2.60               | 1                        |
| 25:HA      | HB2       | {4,2.77}         | TYR          | 3.87(0.47)             | 0.32(0.08)             | 3.56(0.48)                | 2.62               | 0.4                      |
| 25:HB2     | HA        | {2.77,4.02}      | TYR          | 1.87(0.18)             | 0.37(0.05)             | 1.49(0.19)                | 4.23               | 0                        |
| 25:HD1     | HE1       | {7.46,6.74}      | TYR          | 2.35(0.1)              | 0.42(0.04)             | 1.93(0.11)                | 2.60               | 7.5                      |
| 25:HE1     | HD1       | {6.73,7.47}      | TYR          | 1.26(0.07)             | 0.29(0.04)             | 0.97(0.08)                | 2.60               | 1.9                      |
| 26:HA      | HB1       | {3.79,3.05}      | CYS          | 0.83(0.13)             | 0.26(0.08)             | 0.57(0.15)                | 6.34               | 0                        |
| 26:HB2     | HB1       | {1.89,3.06}      | CYS          | 0.96(0.14)             | 0.19(0.08)             | 0.78(0.16)                | 6.06               | 0                        |
| 26:HB1     | HA        | {3.05,3.79}      | CYS          | 0.79(0.12)             | 0.17(0.06)             | 0.62(0.13)                | 5.25               | 0                        |
| 27:HA      | HB1       | {4.43,2.67}      | ASN          | 4.51(0.65)             | 0.18(0.05)             | 4.32(0.65)                | 2.71               | 0.4                      |
| 27:HB1     | HA        | {2.7,4.45}       | ASN          | 2.48(0.27)             | 0.23(0.07)             | 2.25(0.28)                | 2.73               | 0                        |
| 28:HA      | HB1       | {4,1.75}         | GLN          | 1.45(0.16)             | 0.32(0.06)             | 1.13(0.17)                | 2.60               | 9.3                      |
| 28:HB1     | HA        | {1.77,4}         | GLN          | 2.86(0.26)             | 0.75(0.03)             | 2.11(0.26)                | 2.62               | 0.3                      |
| 29:HA      | HB2       | {4.12,0.53}      | MET          | 0.97(0.13)             | 0.15(0.08)             | 0.82(0.15)                | 3.11               | 0                        |
| 29:HB1     | HB2       | {1.03,0.57}      | MET          | 2.55(0.33)             | 0.26(0.07)             | 2.29(0.34)                | 5.06               | 0                        |
| 29:HB2     | HA        | {0.52,4.13}      | MET          | 1.05(0.12)             | 0.04(0.07)             | 1.01(0.14)                | 5.15               | 0                        |

| H measured | H coupled | assignment (ppm) | residue type | $R_1-O_2$ ( $s^{-1}$ ) | $R_1-N_2$ ( $s^{-1}$ ) | $\Delta R_1$ ( $s^{-1}$ ) | b ( $\text{\AA}$ ) | AAREA ( $\text{\AA}^2$ ) |
|------------|-----------|------------------|--------------|------------------------|------------------------|---------------------------|--------------------|--------------------------|
| 30:HA      | HB1       | {4.27,1.41}      | MET          | 1.09(0.15)             | 0.32(0.12)             | 0.77(0.19)                | 5.15               | 0                        |
| 30:HB1     | HA        | {1.41,4.27}      | MET          | 1.36(0.15)             | 0.35(0.07)             | 1.01(0.17)                | 2.61               | 0.3                      |
| 31:HA      | HB2       | {4.31,1.04}      | LYS          | 2.26(0.22)             | 0.48(0.05)             | 1.79(0.22)                | 3.11               | 0                        |
| 31:HB1     | HB2       | {1.64,1.13}      | LYS          | 2.97(0.09)             | 1.63(0.06)             | 1.35(0.11)                | 2.60               | 5.4                      |
| 31:HB2     | HB1       | {1.11,1.65}      | LYS          | 3.06(0.07)             | 1.53(0.03)             | 1.53(0.08)                | 2.60               | 3                        |
| 32:HA      | HB1       | {4.19,3.91}      | SER          | 2.43(0.62)             | 0.46(0.1)              | 1.97(0.63)                | 2.60               | 12.7                     |
| 32:HB1     | HA        | {3.92,4.18}      | SER          | 2.41(0.37)             | 0.61(0.04)             | 1.8(0.38)                 | 2.60               | 22.3                     |
| 32:HB1     | HB2       | {3.98,3.85}      | SER          | 2.87(0.16)             | 0.45(0.03)             | 2.41(0.16)                | 2.60               | 22.3                     |
| 32:HB2     | HB1       | {3.85,3.98}      | SER          | 2.35(0.12)             | 0.48(0.02)             | 1.87(0.12)                | 2.60               | 15                       |
| 33:HA      | HB1       | {4.45,1.54}      | ARG          | 1.67(0.38)             | 0.25(0.1)              | 1.42(0.39)                | 2.60               | 2.3                      |
| 33:HB1     | HA        | {1.53,4.46}      | ARG          | 0.97(0.15)             | 0.23(0.03)             | 0.74(0.15)                | 5.29               | 0                        |
| 34:HA      | HB1       | {4.86,3.02}      | ASN          | 1.4(0.24)              | 0.42(0.11)             | 0.98(0.27)                | 2.60               | 2.1                      |
| 34:HB1     | HB2       | {3.01,2.78}      | ASN          | 2.82(0.1)              | 0.69(0.01)             | 2.14(0.11)                | 2.60               | 12.7                     |
| 34:HB2     | HB1       | {2.77,3.02}      | ASN          | 3.09(0.08)             | 0.64(0.01)             | 2.46(0.08)                | 2.86               | 0                        |
| 35:HB1     | HG        | {1.76,1.33}      | LEU          | 1.16(0.13)             | 0.41(0.05)             | 0.75(0.14)                | 4.58               | 0                        |
| 35:HD11    | HG        | {0.49,1.28}      | LEU          | 1.02(0.14)             | 0.78(0.09)             | 0.24(0.17)                | 5.47               | 0                        |
| 35:HD21    | HG        | {0.36,1.25}      | LEU          | 1.28(0.11)             | 0.52(0.03)             | 0.76(0.11)                | 2.67               | 0.1                      |
| 35:HG      | HD11      | {1.24,0.5}       | LEU          | 1.14(0.09)             | 0.51(0.03)             | 0.64(0.1)                 | 4.85               | 0                        |
| 36:HB      | HG1       | {4.93,0.84}      | THR          | 1.64(0.1)              | 0.53(0.03)             | 1.1(0.11)                 | 3.34               | 0                        |
| 36:HG1     | HB        | {0.83,4.9}       | THR          | 2.96(0.26)             | 0.96(0.07)             | 2(0.27)                   | 2.60               | 2.6                      |
| 37:HA      | HB1       | {4.19,1.54}      | LYS          | 1.55(0.18)             | 0.8(0.16)              | 0.75(0.24)                | 2.60               | 10.9                     |
| 37:HB1     | HA        | {1.49,4.18}      | LYS          | 2.2(0.14)              | 1.03(0.08)             | 1.17(0.16)                | 2.60               | 1.5                      |
| 38:HA      | HB1       | {4.39,2.55}      | ASP          | 2.04(0.13)             | 0.3(0.03)              | 1.74(0.13)                | 2.60               | 4                        |
| 38:HB1     | HB2       | {2.58,2.38}      | ASP          | 2.92(0.14)             | 0.45(0.02)             | 2.47(0.15)                | 2.60               | 5.6                      |
| 38:HB2     | HB1       | {2.38,2.59}      | ASP          | 2.68(0.17)             | 0.41(0.04)             | 2.27(0.18)                | 2.60               | 13.9                     |
| 39:HA      | HB1       | {3.51,1.47}      | ARG          | 1.41(0.57)             | 0.01(0.09)             | 1.39(0.58)                | 2.60               | 2.1                      |
| 39:HB1     | HA        | {1.46,3.52}      | ARG          | 2.24(0.51)             | 0.48(0.12)             | 1.75(0.53)                | 2.60               | 10.6                     |
| 40:HA      | HB2       | {4.8,2.57}       | CYS          | 0.94(0.12)             | 0.28(0.06)             | 0.66(0.14)                | 4.80               | 0                        |
| 40:HB2     | HA        | {2.54,4.81}      | CYS          | 1.09(0.14)             | 0.25(0.06)             | 0.84(0.15)                | 4.06               | 0                        |
| 41:HA      | HB1       | {4.49,1.31}      | LYS          | 0.97(0.18)             | 0.45(0.21)             | 0.52(0.28)                | 3.45               | 0                        |
| 41:HB1     | HA        | {1.29,4.52}      | LYS          | 1.61(0.3)              | 0.5(0.09)              | 1.1(0.31)                 | 2.60               | 3.1                      |
| 43:HA      | HB        | {5.46,1.89}      | VAL          | 1.29(0.11)             | 0.54(0.04)             | 0.75(0.12)                | 4.59               | 0                        |
| 43:HB      | HG11      | {1.88,0.61}      | VAL          | 3.82(0.16)             | 0.9(0.02)              | 2.92(0.16)                | 2.60               | 11.7                     |
| 43:HG11    | HB        | {0.6,1.89}       | VAL          | 4.29(0.16)             | 1.59(0.06)             | 2.7(0.17)                 | 3.61               | 0                        |
| 45:HA      | HB        | {5.21,1.95}      | THR          | 1.01(0.08)             | 0.3(0.04)              | 0.7(0.09)                 | 4.57               | 0                        |
| 45:HB      | HA        | {1.95,5.22}      | THR          | 1.18(0.13)             | 0.44(0.04)             | 0.74(0.13)                | 2.83               | 0                        |
| 45:HG1     | HB        | {0.29,1.97}      | THR          | 2.39(0.21)             | 0.97(0.15)             | 1.42(0.26)                | 2.86               | 0.6                      |

| H measured | H coupled | assignment (ppm) | residue type | $R_{1-O_2}$ ( $s^{-1}$ ) | $R_{1-N_2}$ ( $s^{-1}$ ) | $\Delta R_1$ ( $s^{-1}$ ) | b ( $\text{\AA}$ ) | AAREA ( $\text{\AA}^2$ ) |
|------------|-----------|------------------|--------------|--------------------------|--------------------------|---------------------------|--------------------|--------------------------|
| 46:HA      | HB1       | {4.88,2.42}      | PHE          | 0.83(0.3)                | 0.46(0.14)               | 0.37(0.33)                | 6.87               | 0                        |
| 46:HB1     | HA        | {2.44,4.88}      | PHE          | 0.46(0.14)               | 0.02(0.07)               | 0.44(0.16)                | 7.85               | 0                        |
| 46:HD1     | HE1       | {7.04,7.2}       | PHE          | 0.78(0.09)               | 0.18(0.05)               | 0.59(0.1)                 | 6.20               | 0                        |
| 46:HE1     | HZ        | {7.19,6.85}      | PHE          | 0.78(0.09)               | 0.23(0.05)               | 0.54(0.1)                 | 6.31               | 0                        |
| 46:HZ      | HE1       | {6.85,7.2}       | PHE          | 0.74(0.07)               | 0.28(0.05)               | 0.46(0.09)                | 7.26               | 0                        |
| 47:HA      | HB        | {4.25,2.27}      | VAL          | 1.23(0.17)               | 0.33(0.07)               | 0.9(0.18)                 | 7.64               | 0                        |
| 47:HB      | HG21      | {2.26,0.57}      | VAL          | 1.68(0.08)               | 0.47(0.05)               | 1.21(0.09)                | 7.35               | 0                        |
| 47:HG11    | HB        | {0.66,2.28}      | VAL          | 1.88(0.32)               | 0.68(0.06)               | 1.2(0.32)                 | 6.31               | 0                        |
| 47:HG21    | HB        | {0.53,2.27}      | VAL          | 1.58(0.2)                | 0.55(0.1)                | 1.04(0.22)                | 6.96               | 0                        |
| 48:HA      | HB2       | {5.45,2.96}      | HIS          | 1.47(0.14)               | 0.1(0.08)                | 1.37(0.16)                | 3.60               | 0                        |
| 48:HB1     | HB2       | {3.36,2.97}      | HIS          | 2.33(0.15)               | 0.19(0.06)               | 2.14(0.16)                | 3.70               | 0                        |
| 48:HB2     | HA        | {2.96,5.46}      | HIS          | 1.53(0.12)               | 0.27(0.06)               | 1.26(0.14)                | 3.25               | 0                        |
| 49:HA      | HB1       | {4.9,1.12}       | GLU          | 2.22(0.19)               | 0.32(0.04)               | 1.9(0.2)                  | 2.60               | 5.2                      |
| 50:HB1     | HB2       | {4.24,4.04}      | SER          | 2.12(0.1)                | 0.36(0.03)               | 1.75(0.1)                 | 2.60               | 16.3                     |
| 50:HB2     | HB1       | {4.03,4.26}      | SER          | 2.16(0.09)               | 0.37(0.03)               | 1.79(0.09)                | 2.60               | 22.6                     |
| 51:HA      | HB1       | {4.07,1.51}      | LEU          | 6.83(0.9)                | 0.58(0.07)               | 6.24(0.91)                | 4.32               | 0                        |
| 51:HB1     | HA        | {1.5,4.09}       | LEU          | 4.16(0.46)               | 0.69(0.05)               | 3.47(0.47)                | 2.60               | 4.1                      |
| 51:HD11    | HG        | {0.59,1.2}       | LEU          | 3.51(0.37)               | 0.98(0.08)               | 2.53(0.38)                | 3.13               | 0                        |
| 51:HD21    | HB1       | {0.65,1.64}      | LEU          | 0.96(0.21)               | 0.2(0.08)                | 0.77(0.22)                | 2.60               | 7.7                      |
| 51:HG      | HD11      | {1.2,0.57}       | LEU          | 5.68(0.52)               | 0.83(0.05)               | 4.84(0.53)                | 2.64               | 0                        |
| 52:HA      | HB1       | {4.1,1.06}       | ALA          | 3.2(0.12)                | 0.69(0.04)               | 2.5(0.12)                 | 2.60               | 0.9                      |
| 52:HB1     | HA        | {1.05,4.12}      | ALA          | 3.51(0.14)               | 1.2(0.05)                | 2.3(0.15)                 | 2.60               | 18.8                     |
| 53:HA      | HB1       | {4.37,2.89}      | ASP          | 2.41(0.21)               | 0.32(0.04)               | 2.09(0.21)                | 2.60               | 2.1                      |
| 53:HB1     | HA        | {2.86,4.38}      | ASP          | 1.99(0.12)               | 0.43(0.05)               | 1.57(0.13)                | 3.28               | 0                        |
| 53:HB2     | HB1       | {2.34,2.87}      | ASP          | 2.93(0.17)               | 0.51(0.04)               | 2.43(0.18)                | 2.60               | 4.1                      |
| 54:HA      | HB        | {3.68,1.97}      | VAL          | 1.85(0.29)               | 0.56(0.06)               | 1.29(0.3)                 | 4.88               | 0                        |
| 54:HB      | HA        | {1.94,3.68}      | VAL          | 20.95(3.22)              | 0.61(0.04)               | 20.34(3.22)               | 4.42               | 0                        |
| 55:HA      | HB1       | {3.55,2.02}      | GLN          | 3.92(0.79)               | 0.49(0.07)               | 3.42(0.79)                | 4.03               | 0                        |
| 55:HB1     | HA        | {2,3.56}         | GLN          | 4.94(0.43)               | 0.57(0.07)               | 4.36(0.43)                | 2.60               | 1.4                      |
| 56:HA      | HB1       | {4.01,1.15}      | ALA          | 2.23(0.06)               | 0.51(0.04)               | 1.73(0.08)                | 2.60               | 9.4                      |
| 56:HB1     | HA        | {1.14,4.02}      | ALA          | 2.72(0.08)               | 0.83(0.02)               | 1.89(0.08)                | 2.60               | 7                        |
| 57:HA      | HB        | {2.83,1.91}      | VAL          | 1.05(0.12)               | 0.38(0.05)               | 0.67(0.13)                | 4.69               | 0                        |
| 57:HG11    | HA        | {0.71,2.91}      | VAL          | 2.16(0.51)               | 0.65(0.14)               | 1.51(0.53)                | 5.49               | 0                        |
| 57:HB      | HA        | {1.9,2.85}       | VAL          | 1.46(0.08)               | 0.68(0.05)               | 0.78(0.09)                | 6.03               | 0                        |
| 58:HA      | HB1       | {3.43,2.39}      | CYS          | 0.86(0.11)               | 0.24(0.09)               | 0.62(0.14)                | 4.67               | 0                        |
| 58:HB1     | HA        | {2.37,3.44}      | CYS          | 1.27(0.08)               | 0.28(0.07)               | 0.99(0.11)                | 2.60               | 3.2                      |
| 59:HA      | HB1       | {4.57,3.96}      | SER          | 1.6(0.22)                | 0.21(0.06)               | 1.39(0.23)                | 2.60               | 9.9                      |

| H measured | H coupled | assignment (ppm) | residue type | $R_{1-O_2}$ ( $s^{-1}$ ) | $R_{1-N_2}$ ( $s^{-1}$ ) | $\Delta R_1$ ( $s^{-1}$ ) | b ( $\text{\AA}$ ) | AAREA ( $\text{\AA}^2$ ) |
|------------|-----------|------------------|--------------|--------------------------|--------------------------|---------------------------|--------------------|--------------------------|
| 59:HB1     | HA        | {3.95,4.57}      | SER          | 2.42(0.21)               | 0.31(0.03)               | 2.1(0.22)                 | 2.60               | 18                       |
| 61:HA      | HB1       | {4.36,1.89}      | LYS          | 1.56(0.14)               | 0.42(0.04)               | 1.13(0.15)                | 2.60               | 4.1                      |
| 61:HB1     | HA        | {1.89,4.36}      | LYS          | 2.01(0.1)                | 0.51(0.02)               | 1.5(0.11)                 | 2.77               | 0.1                      |
| 62:HA      | HB2       | {4.36,2.38}      | ASN          | 1.36(0.14)               | 0.21(0.04)               | 1.15(0.14)                | 4.31               | 0                        |
| 62:HB1     | HB2       | {2.64,2.38}      | ASN          | 2.55(0.1)                | 0.4(0.03)                | 2.15(0.11)                | 2.60               | 4.8                      |
| 62:HB2     | HB1       | {2.38,2.64}      | ASN          | 2.72(0.16)               | 0.35(0.04)               | 2.37(0.16)                | 2.60               | 13.3                     |
| 63:HB      | HG21      | {1.82,-0.06}     | VAL          | 3.09(0.11)               | 0.82(0.05)               | 2.27(0.12)                | 2.60               | 10.3                     |
| 63:HG21    | HB        | {-0.07,1.82}     | VAL          | 1.93(0.14)               | 0.94(0.05)               | 0.99(0.15)                | 4.27               | 0                        |
| 64:HA      | HB1       | {4.29,0.89}      | ALA          | 3.55(0.17)               | 0.58(0.04)               | 2.97(0.17)                | 2.90               | 0                        |
| 64:HB1     | HA        | {0.87,4.31}      | ALA          | 3.96(0.17)               | 1.01(0.04)               | 2.96(0.17)                | 2.60               | 17.2                     |
| 65:HA      | HB2       | {4.58,2.28}      | CYS          | 1.42(0.2)                | 0.45(0.04)               | 0.97(0.21)                | 2.92               | 0                        |
| 65:HB2     | HA        | {2.28,4.57}      | CYS          | 1.95(0.21)               | 0.52(0.03)               | 1.44(0.22)                | 2.60               | 1.8                      |
| 66:HA      | HB1       | {3.88,1.62}      | LYS          | 2.43(0.31)               | 0.63(0.11)               | 1.8(0.33)                 | 2.60               | 12.1                     |
| 66:HB1     | HA        | {1.62,3.91}      | LYS          | 2.41(0.17)               | 0.88(0.05)               | 1.54(0.17)                | 2.60               | 5.8                      |
| 66:HB2     | HA        | {1.47,3.91}      | LYS          | 1.92(0.69)               | 1.26(0.27)               | 0.66(0.74)                | 2.60               | 11.2                     |
| 67:HA      | HB2       | {4.54,2.55}      | ASN          | 1(0.1)                   | 0.25(0.1)                | 0.75(0.14)                | 2.60               | 13                       |
| 67:HB1     | HB2       | {3.08,2.49}      | ASN          | 2.49(0.1)                | 0.23(0.03)               | 2.27(0.11)                | 2.60               | 13.8                     |
| 67:HB2     | HA        | {2.52,4.54}      | ASN          | 1.16(0.12)               | 0.24(0.06)               | 0.92(0.14)                | 2.60               | 20.3                     |
| 68:HA1     | HA2       | {4.28,3.44}      | GLY          | 3.02(0.17)               | 0.21(0.04)               | 2.82(0.18)                | 2.60               | 11.6                     |
| 68:HA2     | HA1       | {3.43,4.3}       | GLY          | 2.71(0.12)               | 0.2(0.04)                | 2.51(0.12)                | 2.60               | 13.8                     |
| 69:HA      | HB2       | {4.36,1.89}      | GLN          | 1.68(0.17)               | 0.46(0.03)               | 1.23(0.18)                | 2.60               | 8.6                      |
| 69:HB2     | HA        | {1.89,4.36}      | GLN          | 2(0.1)                   | 0.5(0.02)                | 1.5(0.1)                  | 2.60               | 1.7                      |
| 70:HB      | HG1       | {4.74,0.77}      | THR          | 29.36(5.54)              | 0.51(0.04)               | 28.84(5.54)               | 2.60               | 7.6                      |
| 70:HG1     | HB        | {0.75,4.75}      | THR          | 8.22(2.92)               | 1.04(0.07)               | 7.18(2.92)                | 2.60               | 18.9                     |
| 71:HA      | HB2       | {4.98,2.39}      | ASN          | 65.34(>10)               | 0.01(0.25)               | 65.34(>10)                | 2.60               | 1.3                      |
| 71:HB1     | HB2       | {3.52,2.53}      | ASN          | 2.02(0.11)               | 0.18(0.05)               | 1.84(0.12)                | 2.77               | 0                        |
| 71:HB2     | HB1       | {2.53,3.53}      | ASN          | 2.16(0.08)               | 0.14(0.04)               | 2.02(0.09)                | 2.60               | 17.9                     |
| 72:HB1     | HB2       | {2.61,2.23}      | CYS          | 3.06(0.45)               | 0.63(0.05)               | 2.42(0.45)                | 4.99               | 0                        |
| 72:HB2     | HB1       | {2.23,2.58}      | CYS          | 5.37(0.73)               | 0.69(0.05)               | 4.68(0.73)                | 4.58               | 0                        |
| 73:HA      | HB2       | {5.16,1.83}      | TYR          | 0.91(0.21)               | 0.26(0.09)               | 0.65(0.23)                | 6.23               | 0                        |
| 73:HB1     | HB2       | {2.66,1.85}      | TYR          | 0.76(0.16)               | 0.31(0.08)               | 0.45(0.18)                | 6.58               | 0                        |
| 73:HB2     | HB1       | {1.86,2.66}      | TYR          | 1.04(0.11)               | 0.31(0.04)               | 0.73(0.11)                | 5.54               | 0                        |
| 74:HA      | HB1       | {5.52,1.38}      | GLN          | 0.92(0.23)               | 0.2(0.09)                | 0.73(0.24)                | 5.08               | 0                        |
| 74:HB1     | HA        | {1.36,5.51}      | GLN          | 1.06(0.27)               | 0.53(0.18)               | 0.53(0.32)                | 3.67               | 0                        |
| 75:HA      | HB1       | {4.7,3.95}       | SER          | 1.33(0.17)               | 0.53(0.05)               | 0.79(0.18)                | 3.92               | 0                        |
| 75:HB1     | HA        | {3.93,4.71}      | SER          | 1.01(0.08)               | 0.54(0.05)               | 0.47(0.1)                 | 2.61               | 0.4                      |
| 76:HD1     | HE1       | {7.53,7.2}       | TYR          | 2.81(0.08)               | 0.24(0.04)               | 2.57(0.09)                | 2.60               | 8                        |

| H measured | H coupled | assignment (ppm) | residue type | $R_{1-O_2}$ ( $s^{-1}$ ) | $R_{1-N_2}$ ( $s^{-1}$ ) | $\Delta R_1$ ( $s^{-1}$ ) | b ( $\text{\AA}$ ) | AAREA ( $\text{\AA}^2$ ) |
|------------|-----------|------------------|--------------|--------------------------|--------------------------|---------------------------|--------------------|--------------------------|
| 76:HE1     | HD1       | {7.18,7.56}      | TYR          | 2.16(0.06)               | 0.26(0.04)               | 1.89(0.07)                | 2.60               | 7.4                      |
| 77:HA      | HB2       | {4.92,3.73}      | SER          | 1.98(0.16)               | 0.33(0.05)               | 1.65(0.17)                | 2.60               | 3.9                      |
| 77:HB1     | HB2       | {3.9,3.72}       | SER          | 3.1(0.06)                | 0.74(0.01)               | 2.36(0.06)                | 2.60               | 16.2                     |
| 77:HB2     | HA        | {3.72,4.92}      | SER          | 2.64(0.22)               | 0.64(0.05)               | 2(0.23)                   | 2.60               | 10.8                     |
| 78:HA      | HB        | {3.51,3.32}      | THR          | 2.71(0.26)               | 0.59(0.07)               | 2.12(0.27)                | 4.71               | 0                        |
| 78:HB      | HG1       | {3.51,0.24}      | THR          | 1.37(0.08)               | 0.54(0.03)               | 0.83(0.09)                | 3.53               | 0                        |
| 78:HG1     | HB        | {0.23,3.52}      | THR          | 2.51(0.11)               | 1.06(0.05)               | 1.45(0.12)                | 2.60               | 14.5                     |
| 79:HA      | HB1       | {4.6,1.43}       | MET          | 1.27(0.14)               | 0.28(0.07)               | 0.99(0.16)                | 2.60               | 0.1                      |
| 79:HB1     | HA        | {1.41,4.6}       | MET          | 1.04(0.13)               | 0.31(0.06)               | 0.73(0.15)                | 5.24               | 0                        |
| 80:HA      | HB1       | {4.9,4.07}       | SER          | 1.64(0.22)               | 0.25(0.06)               | 1.39(0.23)                | 3.31               | 0                        |
| 80:HB1     | HA        | {4.06,4.91}      | SER          | 1.75(0.11)               | 0.31(0.07)               | 1.44(0.13)                | 2.60               | 9.7                      |
| 81:HA      | HN        | {5.62,9.78}      | ILE          | 1.43(0.24)               | 0.3(0.06)                | 1.13(0.25)                | 5.37               | 0                        |
| 81:HB      | HG11      | {1.44,0.47}      | ILE          | 1.54(0.11)               | 0.49(0.04)               | 1.05(0.12)                | 5.36               | 0                        |
| 81:HG11    | HB        | {0.46,1.44}      | ILE          | 1.17(0.2)                | 0.4(0.08)                | 0.77(0.21)                | 4.70               | 0                        |
| 82:HA      | HB        | {5.2,3.82}       | THR          | 2.39(0.18)               | 0.36(0.05)               | 2.03(0.18)                | 5.24               | 0                        |
| 82:HB      | HG1       | {3.81,0.97}      | THR          | 1.05(0.1)                | 0.43(0.06)               | 0.62(0.12)                | 7.02               | 0                        |
| 82:HG1     | HB        | {0.96,3.82}      | THR          | 1.93(0.18)               | 0.78(0.08)               | 1.15(0.19)                | 4.72               | 0.2                      |
| 83:HA      | HB1       | {5.13,2.35}      | ASP          | 1.69(0.2)                | 0.3(0.05)                | 1.39(0.21)                | 4.56               | 0                        |
| 83:HB1     | HA        | {2.32,5.14}      | ASP          | 7.05(1.29)               | 0.53(0.06)               | 6.52(1.3)                 | 2.60               | 5.1                      |
| 84:HA      | HB1       | {6.1,2.8}        | CYS          | 0.88(0.1)                | 0.22(0.05)               | 0.65(0.12)                | 3.57               | 0                        |
| 84:HB1     | HA        | {2.8,6.1}        | CYS          | 0.74(0.1)                | 0.29(0.08)               | 0.45(0.13)                | 5.98               | 0                        |
| 85:HB1     | HA        | {1.72,5.56}      | ARG          | 3.08(0.62)               | 0.73(0.16)               | 2.35(0.64)                | 2.60               | 2.7                      |
| 85:HB2     | HA        | {1.51,5.56}      | ARG          | 2.69(0.65)               | 0.56(0.16)               | 2.12(0.67)                | 2.60               | 5.7                      |
| 87:HB      | HG1       | {4.5,0.72}       | THR          | 2.04(0.11)               | 0.42(0.04)               | 1.62(0.12)                | 2.60               | 12                       |
| 87:HG1     | HB        | {0.71,4.52}      | THR          | 2.13(0.15)               | 0.63(0.02)               | 1.5(0.15)                 | 2.60               | 5.6                      |
| 89:HA      | HB1       | {4.49,3.8}       | SER          | 2.05(0.22)               | 0.28(0.05)               | 1.77(0.22)                | 2.60               | 8.1                      |
| 89:HB1     | HA        | {3.81,4.5}       | SER          | 2.5(0.28)                | 0.54(0.1)                | 1.96(0.3)                 | 2.60               | 8.7                      |
| 89:HB2     | HB1       | {3.69,3.81}      | SER          | 4.53(0.32)               | 0.73(0.05)               | 3.8(0.32)                 | 2.60               | 13.8                     |
| 90:HA      | HB1       | {4.06,3.79}      | SER          | 1.16(0.27)               | 0.34(0.11)               | 0.83(0.29)                | 2.99               | 0                        |
| 90:HB1     | HA        | {3.78,4.04}      | SER          | 2.08(0.21)               | 0.46(0.11)               | 1.61(0.24)                | 3.99               | 0                        |
| 91:HA      | HB1       | {4.43,1.44}      | LYS          | 1.54(0.16)               | 0.67(0.07)               | 0.87(0.18)                | 2.60               | 6                        |
| 91:HB1     | HA        | {1.43,4.44}      | LYS          | 2.45(0.12)               | 1.09(0.04)               | 1.36(0.13)                | 2.60               | 5.6                      |
| 92:HA      | HB2       | {3.72,2.6}       | TYR          | 1.1(0.13)                | 0.09(0.05)               | 1.01(0.14)                | 4.38               | 0                        |
| 92:HB1     | HB2       | {3.33,2.59}      | TYR          | 1.6(0.18)                | 0.04(0.05)               | 1.56(0.19)                | 2.60               | 4.9                      |
| 92:HB2     | HA        | {2.58,3.73}      | TYR          | 1.38(0.12)               | 0.15(0.05)               | 1.23(0.13)                | 2.60               | 11.2                     |
| 93:HA      | HB1       | {3.13,0.78}      | PRO          | 1.31(0.28)               | 0.03(0.08)               | 1.28(0.29)                | 3.21               | 0                        |
| 93:HB1     | HA        | {0.79,3.14}      | PRO          | 1.77(0.31)               | 0.17(0.1)                | 1.6(0.32)                 | 2.60               | 13.7                     |

| H measured | H coupled | assignment (ppm) | residue type | $R_1-O_2$ ( $s^{-1}$ ) | $R_1-N_2$ ( $s^{-1}$ ) | $\Delta R_1$ ( $s^{-1}$ ) | b ( $\text{\AA}$ ) | AAREA ( $\text{\AA}^2$ ) |
|------------|-----------|------------------|--------------|------------------------|------------------------|---------------------------|--------------------|--------------------------|
| 94:HA      | HB1       | {4.96,2.55}      | ASN          | 2.39(0.15)             | 0.34(0.04)             | 2.05(0.15)                | 2.60               | 6.6                      |
| 94:HB1     | HA        | {2.56,4.97}      | ASN          | 2.37(0.16)             | 0.56(0.02)             | 1.81(0.16)                | 2.60               | 3.1                      |
| 95:HA      | HB1       | {4.66,2.79}      | CYS          | 8.15(2.56)             | 0.1(0.06)              | 8.05(2.56)                | 4.56               | 0                        |
| 95:HB1     | HA        | {2.79,4.68}      | CYS          | 1.99(0.17)             | 0.17(0.05)             | 1.83(0.17)                | 2.60               | 2.4                      |
| 96:HA      | HB1       | {4.81,0.88}      | ALA          | 5.13(0.72)             | 0.6(0.04)              | 4.53(0.72)                | 2.63               | 0                        |
| 96:HB1     | HA        | {0.85,4.82}      | ALA          | 3.76(0.28)             | 1.14(0.05)             | 2.63(0.29)                | 2.86               | 0                        |
| 97:HA      | HB2       | {4.93,2.12}      | TYR          | 0.92(0.11)             | 0.32(0.1)              | 0.6(0.14)                 | 4.69               | 0                        |
| 97:HB1     | HB2       | {2.71,2.09}      | TYR          | 1.5(0.15)              | 0.4(0.05)              | 1.09(0.15)                | 5.07               | 0                        |
| 97:HB2     | HB1       | {2.09,2.71}      | TYR          | 1.9(0.11)              | 0.46(0.04)             | 1.44(0.12)                | 5.80               | 0                        |
| 98:HA      | HB1       | {4.82,1.65}      | LYS          | 2.84(0.52)             | 0.65(0.11)             | 2.19(0.53)                | 2.60               | 2.4                      |
| 98:HB1     | HA        | {1.64,4.82}      | LYS          | 4.93(1.39)             | 0.87(0.09)             | 4.06(1.39)                | 2.60               | 4.5                      |
| 99:HA      | HB        | {5.27,4.21}      | THR          | 1.3(0.12)              | 0.33(0.05)             | 0.97(0.13)                | 4.22               | 0                        |
| 99:HB      | HA        | {4.21,5.28}      | THR          | 2.69(0.17)             | 0.49(0.04)             | 2.2(0.18)                 | 2.61               | 0.7                      |
| 99:HG1     | HB        | {0.95,4.21}      | THR          | 3.71(0.24)             | 0.75(0.02)             | 2.96(0.24)                | 3.58               | 0                        |
| 100:HA     | HB        | {4.67,4.09}      | THR          | 3.21(0.27)             | 0.44(0.06)             | 2.77(0.28)                | 2.60               | 3.5                      |
| 100:HB     | HG1       | {4.08,0.89}      | THR          | 4.81(0.29)             | 0.61(0.04)             | 4.2(0.3)                  | 2.69               | 0.3                      |
| 100:HG1    | HB        | {0.89,4.09}      | THR          | 5(0.29)                | 0.91(0.02)             | 4.09(0.3)                 | 2.60               | 7.9                      |
| 101:HA     | HB1       | {5.06,1.7}       | GLN          | 2.79(0.36)             | 0.34(0.07)             | 2.45(0.37)                | 3.83               | 0                        |
| 101:HB1    | HA        | {1.69,5.06}      | GLN          | 3.44(0.38)             | 0.38(0.07)             | 3.06(0.39)                | 2.60               | 7                        |
| 102:HA     | HB1       | {4.69,0.98}      | ALA          | 3.92(0.46)             | 0.46(0.04)             | 3.46(0.46)                | 2.60               | 10.9                     |
| 102:HB1    | HA        | {0.97,4.69}      | ALA          | 8.16(1.35)             | 0.78(0.03)             | 7.38(1.35)                | 2.60               | 6.5                      |
| 103:HA     | HB1       | {5.93,2.35}      | ASN          | 1.22(0.12)             | 0.43(0.1)              | 0.79(0.15)                | 4.40               | 0                        |
| 103:HB1    | HB2       | {2.36,2.09}      | ASN          | 2.58(0.09)             | 0.7(0.03)              | 1.88(0.1)                 | 2.60               | 14.4                     |
| 103:HB2    | HB1       | {2.1,2.39}       | ASN          | 3.16(0.23)             | 0.66(0.07)             | 2.5(0.24)                 | 2.63               | 0.5                      |
| 105:HA     | HB2       | {4.47,3.05}      | HIS          | 1.13(0.17)             | 0.32(0.06)             | 0.81(0.18)                | 5.48               | 0                        |
| 105:HB1    | HB2       | {3.21,3.05}      | HIS          | 2.53(0.09)             | 0.91(0.04)             | 1.62(0.1)                 | 3.60               | 0                        |
| 105:HB2    | HA        | {3.04,4.48}      | HIS          | 1.25(0.14)             | 0.39(0.05)             | 0.86(0.15)                | 4.56               | 0                        |
| 106:HB     | HG11      | {1.5,0.67}       | ILE          | 1.02(0.1)              | 0.4(0.04)              | 0.63(0.11)                | 7.01               | 0                        |
| 106:HG11   | HG21      | {0.7,1.01}       | ILE          | 2.08(0.16)             | 0.81(0.05)             | 1.27(0.17)                | 5.74               | 0                        |
| 106:HG21   | HG11      | {1.03,0.71}      | ILE          | 1.79(0.12)             | 0.79(0.05)             | 1(0.13)                   | 6.04               | 0                        |
| 107:HA     | HB        | {5.45,1.13}      | ILE          | 0.93(0.26)             | 0.29(0.12)             | 0.64(0.28)                | 6.13               | 0                        |
| 107:HB     | HG11      | {1.1,0.15}       | ILE          | 1.15(0.14)             | 0.46(0.04)             | 0.69(0.14)                | 3.70               | 0                        |
| 107:HG11   | HB        | {0.14,1.11}      | ILE          | 1.14(0.11)             | 0.55(0.08)             | 0.59(0.13)                | 4.15               | 0                        |
| 108:HA     | HB        | {4.86,1.85}      | VAL          | 1.36(0.09)             | 0.3(0.07)              | 1.06(0.12)                | 6.69               | 0                        |
| 108:HB     | HG21      | {1.76,0.22}      | VAL          | 1.27(0.11)             | 0.52(0.03)             | 0.75(0.12)                | 6.93               | 0                        |
| 108:HG21   | HB        | {0.2,1.74}       | VAL          | 1.19(0.15)             | 0.65(0.09)             | 0.54(0.17)                | 7.73               | 0                        |
| 109:HA     | HB1       | {5.54,1.07}      | ALA          | 0.94(0.09)             | 0.35(0.05)             | 0.59(0.11)                | 4.95               | 0                        |



| H measured | H coupled | assignment (ppm) | residue type | $R_1-O_2$ ( $s^{-1}$ ) | $R_1-N_2$ ( $s^{-1}$ ) | $\Delta R_1$ ( $s^{-1}$ ) | b ( $\text{\AA}$ ) | AAREA ( $\text{\AA}^2$ ) |
|------------|-----------|------------------|--------------|------------------------|------------------------|---------------------------|--------------------|--------------------------|
| 109:HB1    | HA        | {1.06,5.55}      | ALA          | 1.51(0.12)             | 0.48(0.04)             | 1.03(0.13)                | 2.60               | 0.4                      |
| 110:HA     | HB1       | {5.46,2.4}       | CYS          | 0.93(0.16)             | 0.2(0.05)              | 0.74(0.16)                | 5.89               | 0                        |
| 110:HB1    | HA        | {2.4,5.46}       | CYS          | 0.8(0.11)              | 0.15(0.06)             | 0.66(0.12)                | 5.06               | 0                        |
| 110:HB1    | HB2       | {2.4,0.7}        | CYS          | 0.86(0.12)             | 0.22(0.05)             | 0.64(0.13)                | 5.06               | 0                        |
| 110:HB2    | HB1       | {0.7,2.4}        | CYS          | 0.86(0.12)             | 0.3(0.06)              | 0.55(0.14)                | 5.39               | 0                        |
| 111:HA     | HB2       | {4.67,1.54}      | GLU          | 1.83(0.5)              | 0.43(0.11)             | 1.4(0.51)                 | 2.60               | 1.9                      |
| 111:HB1    | HA        | {1.75,4.67}      | GLU          | 1.39(0.13)             | 0.53(0.03)             | 0.87(0.13)                | 2.60               | 2                        |
| 111:HB2    | HA        | {1.56,4.68}      | GLU          | 2.92(0.51)             | 0.76(0.08)             | 2.16(0.52)                | 2.60               | 7.3                      |
| 112:HA1    | HA2       | {4.53,3.7}       | GLY          | 2.32(0.11)             | 0.28(0.04)             | 2.04(0.12)                | 2.60               | 18.9                     |
| 112:HA2    | HA1       | {3.68,4.55}      | GLY          | 2.29(0.11)             | 0.27(0.04)             | 2.02(0.12)                | 2.60               | 12.5                     |
| 113:HA     | HB1       | {4.77,2.68}      | ASN          | 4.74(0.82)             | 0.31(0.04)             | 4.43(0.82)                | 3.13               | 0                        |
| 113:HB1    | HA        | {2.77,4.79}      | ASN          | 2.42(0.14)             | 0.49(0.03)             | 1.93(0.14)                | 2.60               | 13.6                     |
| 114:HA     | HB1       | {4.68,2.1}       | PRO          | 2.2(0.26)              | 0.45(0.07)             | 1.75(0.27)                | 2.60               | 3.6                      |
| 114:HB1    | HA        | {2.1,4.68}       | PRO          | 2.4(0.22)              | 0.43(0.03)             | 1.98(0.23)                | 2.60               | 2.9                      |
| 115:HA     | HB1       | {4.23,2.76}      | TYR          | 1.6(0.23)              | 0.27(0.08)             | 1.33(0.24)                | 4.26               | 0                        |
| 115:HB1    | HA        | {2.75,4.24}      | TYR          | 1.75(0.16)             | 0.37(0.05)             | 1.38(0.17)                | 2.60               | 8                        |
| 115:HB2    | HB1       | {2.6,2.82}       | TYR          | 1.07(0.08)             | 0.34(0.03)             | 0.73(0.08)                | 2.60               | 9.5                      |
| 115:HD1    | HE1       | {7.47,7.01}      | TYR          | 1.92(0.08)             | 0.32(0.04)             | 1.6(0.09)                 | 2.63               | 0.4                      |
| 115:HE1    | HD1       | {7,7.49}         | TYR          | 1.6(0.06)              | 0.26(0.04)             | 1.34(0.07)                | 2.60               | 9.2                      |
| 116:HA     | HN        | {4.91,7.9}       | VAL          | 2.58(0.22)             | 0.43(0.03)             | 2.16(0.22)                | 3.57               | 0                        |
| 116:HB     | HG11      | {1.89,0.42}      | VAL          | 3.38(0.21)             | 0.61(0.04)             | 2.77(0.21)                | 2.60               | 0.8                      |
| 116:HG11   | HB        | {0.4,1.89}       | VAL          | 2.53(0.21)             | 0.91(0.09)             | 1.62(0.22)                | 2.60               | 3.3                      |
| 117:HB2    | HG2       | {0.65,-0.28}     | PRO          | 4.63(0.81)             | 0.44(0.07)             | 4.19(0.81)                | 4.59               | 0                        |
| 117:HG2    | HB2       | {-0.28,0.65}     | PRO          | 5.83(0.98)             | 0.36(0.09)             | 5.47(0.99)                | 4.21               | 0                        |
| 118:HB     | HG21      | {1.73,0.11}      | VAL          | 2.47(0.14)             | 0.98(0.05)             | 1.49(0.15)                | 2.61               | 0.5                      |
| 118:HG21   | HB        | {0.09,1.75}      | VAL          | 2.45(0.15)             | 1.16(0.08)             | 1.29(0.17)                | 3.49               | 0                        |
| 119:HA     | HB1       | {5.71,3.18}      | HIS          | 1.18(0.27)             | 0.19(0.08)             | 0.99(0.29)                | 2.60               | 3.2                      |
| 119:HB1    | HA        | {3.17,5.72}      | HIS          | 1.5(0.29)              | 0.26(0.06)             | 1.24(0.3)                 | 2.60               | 10.5                     |
| 120:HA     | HB1       | {4.33,2.54}      | PHE          | 1.54(0.11)             | 0.32(0.06)             | 1.22(0.12)                | 4.90               | 0                        |
| 120:HB1    | HB2       | {2.52,1.16}      | PHE          | 1.14(0.24)             | 0.24(0.07)             | 0.9(0.25)                 | 3.88               | 0                        |
| 120:HB2    | HB1       | {1.15,2.53}      | PHE          | 1.59(0.33)             | 0.3(0.07)              | 1.29(0.34)                | 2.60               | 1.4                      |
| 120:HD1    | HE1       | {6.93,7.32}      | PHE          | 1.96(0.07)             | 0.32(0.05)             | 1.65(0.08)                | 2.60               | 7.3                      |
| 120:HE1    | HD1       | {7.31,6.95}      | PHE          | 1.44(0.07)             | 0.41(0.04)             | 1.03(0.08)                | 2.60               | 3.8                      |
| 121:HA     | HB1       | {4.74,1.97}      | ASP          | 1.96(0.29)             | 0.32(0.05)             | 1.64(0.3)                 | 2.60               | 0.6                      |
| 121:HB1    | HA        | {1.96,4.74}      | ASP          | 1.38(0.12)             | 0.42(0.04)             | 0.96(0.12)                | 4.41               | 0                        |
| 122:HA     | HB1       | {4.48,1}         | ALA          | 1.63(0.06)             | 0.36(0.05)             | 1.26(0.08)                | 2.60               | 4.9                      |
| 122:HB1    | HA        | {0.99,4.49}      | ALA          | 1.61(0.05)             | 0.49(0.03)             | 1.12(0.06)                | 2.80               | 0                        |

| <b>H measured</b> | <b>H coupled</b> | <b>assignment (ppm)</b> | <b>residue type</b> | <b><math>R_{1-O_2}</math> (<math>s^{-1}</math>)</b> | <b><math>R_{1-N_2}</math> (<math>s^{-1}</math>)</b> | <b><math>\Delta R_1</math> (<math>s^{-1}</math>)</b> | <b>b (<math>\text{\AA}</math>)</b> | <b>AAREA (<math>\text{\AA}^2</math>)</b> |
|-------------------|------------------|-------------------------|---------------------|-----------------------------------------------------|-----------------------------------------------------|------------------------------------------------------|------------------------------------|------------------------------------------|
| 123:HA            | HB1              | {5.41,3.78}             | SER                 | 1.1(0.22)                                           | 0.23(0.19)                                          | 0.87(0.29)                                           | 4.62                               | 0                                        |
| 123:HB1           | HA               | {3.78,5.42}             | SER                 | 1.38(0.44)                                          | 0.56(0.08)                                          | 0.82(0.44)                                           | 4.37                               | 0                                        |
| 124:HA            | HB               | {4.29,1.74}             | VAL                 | 2.26(0.59)                                          | 0.62(0.18)                                          | 1.64(0.61)                                           | 2.60                               | 6.2                                      |
| 124:HB            | HA               | {1.75,4.31}             | VAL                 | 2.31(0.29)                                          | 0.74(0.1)                                           | 1.57(0.3)                                            | 2.60                               | 14                                       |
